# Supplementary material for: Compound winter low-wind and cold events impacting the French electricity system: observed evolution and role of large-scale circulation
Source: Copernicus journal article supplement (doi:10.5194/nhess-25-843-2025), 2025-02-25
Supplement: Supplementary file 1 [file nhess-25-843-2025-supplement.pdf]

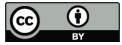

*Supplement of*

## **Compound winter low-wind and cold events impacting the French electricity system: observed evolution and role of large-scale circulation**

**François Collet et al.**

*Correspondence to:* François Collet (collet@cerfacs.fr)

The copyright of individual parts of the supplement might differ from the article licence.

13 Figure S1 shows an increasing and non-linear relationship between ERA5 100-m wind  
14 speed averaged over France against the ERA5 wind capacity factor index at the daily scale.  
15 This increasing and non-linear relationship is expected as the power output of a wind turbine  
16 grows non-linearly with the wind speed at its hub height, provided that the wind speed is  
17 within the turbine's operational range (Mathews, 2006). This figure also shows that low wind  
18 days (scatters below the red dotted line in Figure S1, see section 2.5) are mainly associated  
19 with days with rather low mean wind speeds at 100m in France. These events are therefore  
20 referred to as low wind days in the main text.

21  
22

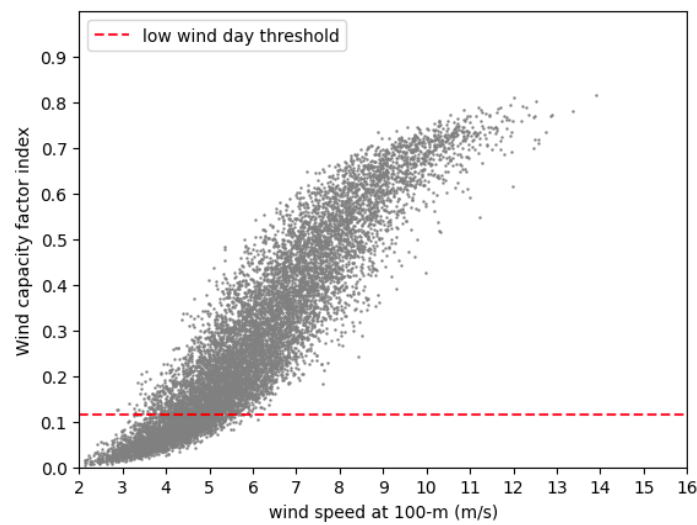

23  
24 Figure S1: Wind capacity factor index (Y-axis) against 100-m wind speed wind averaged over  
25 France (X-axis) as calculated with ERA5 for each day of the 1950-2022 period.

## 26 Sensitivity of compound events to their definition

27

28 In this section, the sensitivity of compound events properties to the thresholds applied  
29 to the wind capacity factor and temperature indices is discussed. In this study, compound events  
30 are defined based on a more extreme threshold for the temperature index (i.e., 5th quantile, or  
31 0°C in ERA5) compared to the wind capacity factor index (i.e., 23th quantile, or 0.11 in ERA5).  
32 Here, two alternative definitions are used and compared with the main definition. The first one  
33 tests a more extreme threshold for the wind capacity factor index (i.e., 5th quantile, or 0.045 in  
34 ERA5) compared to the temperature index (i.e., 23th quantile, or 3.6°C in ERA5). The second  
35 one tests identical thresholds for both indices to define compound events (i.e., 10th quantile for  
36 both indices, or 0.065 and 1.5 °C in ERA5, respectively).

37 Overall, we find that the climatological characteristics of compound events remain  
38 generally similar between these different definitions, with a comparable number of compound  
39 events that are similarly distributed across the extended winter months and have similar  
40 durations (Figure S2).

41

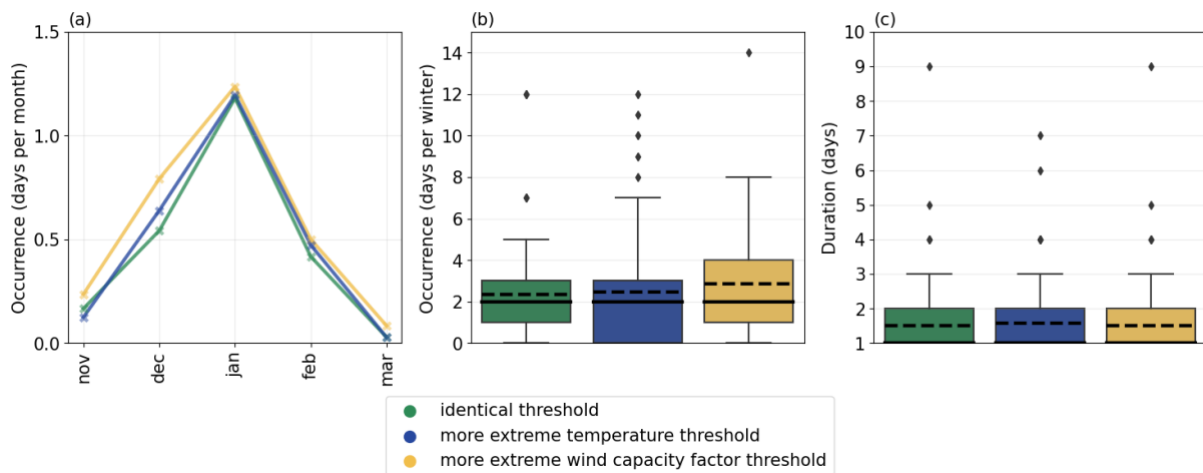

42

43 Figure S2: (a) Monthly mean number of compound low wind and cold events;(b) distributions  
44 of the number of compound events per winter; (c) distribution of the duration (in days) of  
45 compound events in winter over the 1951-2022 period in ERA5. Colors refer to the different  
46 definition tested for the identification of compound low wind and cold events: (green)  
47 identical thresholds for both the temperature and wind capacity factor indices, (blue) more  
48 extreme threshold for the temperature index compared to the wind capacity index as used in  
49 the main text (5th vs 23rd percentile, respectively), and (yellow) more extreme threshold for  
50 the wind capacity factor index compared to the temperature index (5th vs 23rd percentile,  
51 respectively). The solid line and the dashed line in the boxplots in (b) and (c) show the  
52 median and the average, respectively.

53

54 Further exploring the sensitivity to the definition on the observed evolution, we find  
 55 that, while compound events defined with a more extreme temperature threshold significantly  
 56 decrease during the 1951-2022 period in ERA5 ( $p=0.02$ , Figure 5 and Table 1 of the main text),  
 57 the other two definitions of compound events tested here do not exhibit a significant trend over  
 58 this period ( $p=0.38$  and  $p=0.28$ , respectively; Table S2). For these two alternative definitions,  
 59 the absence of trend might result from the lower influence of cold days and the higher influence  
 60 of low wind days in the interannual evolution of compound events (Table S1), as cold days  
 61 exhibit a significant decrease while low wind days exhibit an absence of trend (Table S2).

62  
63

| Compound event definition                   | Pearson correlation<br>$r(\text{low wind days, compound events})$ | $r(\text{cold days, compound events})$ |
|---------------------------------------------|-------------------------------------------------------------------|----------------------------------------|
| More extreme temperature threshold          | 0.20                                                              | 0.85                                   |
| Identical threshold                         | 0.40                                                              | 0.67                                   |
| More extreme wind capacity factor threshold | 0.51                                                              | 0.41                                   |

64  
65 Table S1: Values of the Pearson correlation coefficient between the interannual evolution of  
66 low wind days and compound events (first column) and cold days and compound events (second  
67 column) for each compound event definition (per row) over the 1950-2022 period, in ERA5.

68  
69

| Compound event definition                   | Long-term trend | Low wind days | Cold days    | Compound events |
|---------------------------------------------|-----------------|---------------|--------------|-----------------|
| More extreme temperature threshold          |                 | -0.08 (0.59)  | -0.72 (0.02) | -0.19 (0.02)    |
| Identical threshold                         |                 | -0.38 (0.27)  | -1.5 (0.00)  | 0.0 (0.28)      |
| More extreme wind capacity factor threshold |                 | -0.28 (0.16)  | -2.5 (0.00)  | 0.0 (0.38)      |

70 Table S2: Trend (slope in days/decade) and associated p-value in the number of  
71 compound low wind and cold events, cold days, and low wind days for each compound event  
72 definition over the 1950-2022 period in ERA5. The slope is calculated using the Theil-Sen

73 estimator and the p-value with the Mann-Kendall test. Significant trends (p-value<0.05) are  
74 highlighted with a grey shaded cell.

75

76 We then investigate the average large-scale circulation pattern associated with the  
77 different definitions of compound events. Overall, we find that the three definitions lead to  
78 similar features: strong positive mean sea-level pressure anomalies over the British Isles and  
79 relatively less intense negative anomalies centered over the Azores (Figure S3b). The location  
80 of the positive sea-level pressure anomalies over the British Isles slightly varies according to  
81 compound event definition. We then investigate whether these average differences are linked  
82 with differences in weather type frequencies (see section 2.6 and 3.2). For that, we project  
83 compound events onto the low wind day weather types used in section 2.6., which is made  
84 possible by the fact that compound events, as they are defined, are included in the subset of low  
85 wind days. The weather type WT3 is the most frequent for all compound event definitions,  
86 despite a lower frequency in compound events defined with identical and more extreme wind  
87 thresholds (Figure S3c).

88 Overall, this sensitivity analysis shows that setting a more extreme threshold on either  
89 the wind capacity factor or the temperature index in the definition of compound events has  
90 limited impacts on the characteristics of compound events over the 1951-2022 period, except  
91 for the observed evolution and trend estimate.

92

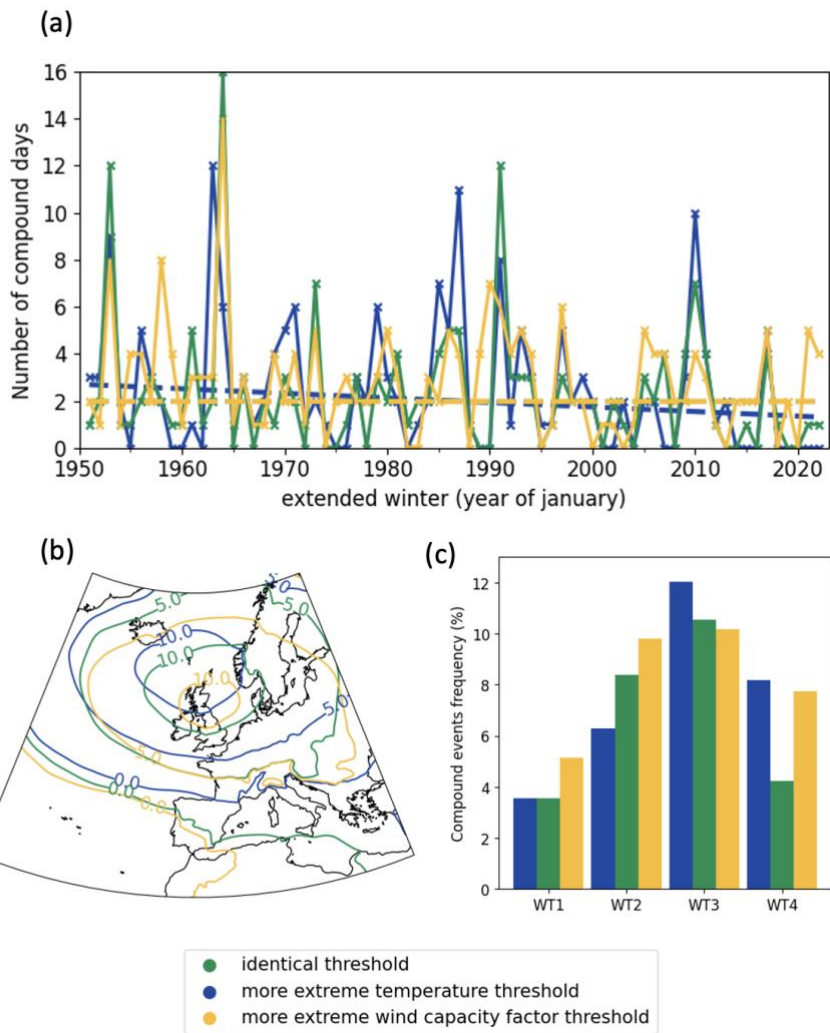

93  
 94 Figure S3: (a) Interannual evolution of the number of compound events per winter, with  
 95 dashed lines showing the linear trend (calculated with the Theil-Sen estimator), (b) composite  
 96 of sea-level pressure, with solid contours corresponding to positive anomalies, (c) frequency  
 97 of compound events for each weather type (in % of weather type size). Colors correspond to  
 98 the different definitions of compound events tested: (green) identical thresholds for both the  
 99 temperature and wind capacity factor indices, (blue) more extreme threshold for the  
 100 temperature index compared to the wind capacity index as used in the main text (5th vs 23rd  
 101 percentile, respectively), and (yellow) more extreme threshold for the wind capacity factor  
 102 index compared to the temperature index (5th vs 23rd percentile, respectively).

103 **References**

- 104 Mathew S 2006 Wind Energy: Fundamentals, Resource Analysis and Economics (Berlin:  
105 Springer)
